# Supplementary material for: Synergistic Killing of Polymyxin B in Combination With the Antineoplastic Drug Mitotane Against Polymyxin-Susceptible and -Resistant Acinetobacter baumannii: A Metabolomic Study
Source: Front Pharmacol. 2018 Apr 16;9:359. doi: 10.3389/fphar.2018.00359 (PMC5911485; doi:10.3389/fphar.2018.00359)
Supplement: Supplementary file 2 [file Table_2.XLSX]

## Sheet: Sheet1
Supplementary Table 2. Significant metabolites identified following exposure to polymyxin B and mitotane alone and in combination in A. baumannii ATCC 19606. Significant fold-changes are highlighted in bold and italic. One-way ANOVA for multiple comparison, FDR ≤ 0.05; Fisher's LSD, p ≤ 0.05.
MASS	RT	FORMULA	METABOLITE	CONFIDENCE	MAP	PATHWAY	Log2-fold change			FDR
							Polmyxin B	Mitotane	Combination
133.038	14.6962	C4H7NO4	L-Aspartate	10	Amino Acid Metabolism	Alanine and aspartate metabolism; Arginine and proline metabolism; Glycine, serine and threonine metabolism; Lysine biosynthesis; Arginine and proline metabolism; Histidine metabolism; beta-Alanine metabolism; Cyanoamino acid metabolism; Carbon fixation	-0.579612	0.0198164	-0.395005	0.037886
274.128	15.0089	C10H18N4O5	N2-Succinyl-L-arginine	8	Amino Acid Metabolism	Arginine and proline metabolism	-0.513702	-0.00984501	0.343569	0.018151
115.063	12.727	C5H9NO2	L-Proline	10	Amino Acid Metabolism	Arginine and proline metabolism; Novobiocin biosynthesis	0.345039	-1.40912	-1.64599	0.00028901
132.09	15.5306	C5H12N2O2	D-Ornithine	7	Amino Acid Metabolism	D-Arginine and D-ornithine metabolism	-0.661736	-0.033862	-0.886542	0.039278
103.063	13.7154	C4H9NO2	N,N-Dimethylglycine	7	Amino Acid Metabolism	Glycine, serine and threonine metabolism	0.0682486	-0.265885	-0.691223	0.010346
104.011	15.1585	C3H4O4	Hydroxypyruvate	6	Amino Acid Metabolism	Glycine, serine and threonine metabolism; Glyoxylate and dicarboxylate metabolism	0.127388	-0.0341571	-0.186144	0.037886
258.085	13.558	C10H14N2O6	(1-Ribosylimidazole)-4-acetate	5	Amino Acid Metabolism	Histidine metabolism	-0.8976	-0.31212	-0.78887	0.020941
174.064	14.2137	C6H10N2O4	N-Formimino-L-glutamate	7	Amino Acid Metabolism	Histidine metabolism	-0.662857	-0.574874	-1.56341	0.0086037
138.043	10.3693	C6H6N2O2	Urocanate	7	Amino Acid Metabolism	Histidine metabolism	0.113903	0.302125	0.706346	0.0060141
161.105	13.1636	C7H15NO3	L-Carnitine	10	Amino Acid Metabolism	Lysine degradation	-1.18639	-1.25298	-2.48774	0.00017198
103.063	11.3023	C4H9NO2	(R)-3-Amino-2-methylpropanoate	5	Amino Acid Metabolism	Undefined	-0.0179428	-0.253233	0.114579	0.038541
174.1	13.5483	C7H14N2O3	N5-Ethyl-L-glutamine	5	Amino Acid Metabolism	Undefined	-0.905788	-0.17636	-1.02832	0.02201
188.08	10.2844	C7H12N2O4	N-Acetylglutamine	9	Amino Acid Metabolism	Undefined	-0.863755	-0.286307	-1.10375	0.043385
416.111	7.52097	C21H20O9	Daidzin	5	Biosynthesis of Secondary Metabolites	Isoflavonoid biosynthesis	0.952402	-0.0665077	0.766156	0.02388
136.037	11.8761	C4H8O5	[FA trihydroxy(4:0)] 2,3,4-trihydroxy-butanoic acid	5	Carbohydrate Metabolism	Ascorbate and aldarate metabolism	0.806498	0.576299	0.591758	0.0070585
180.063	14.6835	C6H12O6	D-Mannose	8	Carbohydrate Metabolism	Fructose and mannose metabolism; Galactose metabolism	-0.00914657	-0.97215	-0.129591	0.04398
342.116	15.7721	C12H22O11	Lactose	10	Carbohydrate Metabolism	Galactose metabolism	-1.55428	-1.31685	-3.2948	0.0028818
422.083	17.1899	C12H23O14P	alpha,alpha'-Trehalose 6-phosphate	8	Carbohydrate Metabolism	Starch and sucrose metabolism	-1.78425	-0.208526	-2.51355	0.0045961
545.196	16.943	C20H35NO16	alpha-D-Galactosyl-N-acetyllactosamine	5	Carbohydrate Metabolism	Undefined	-0.842253	-1.44579	-1.98973	0.018151
503.185	16.9614	C18H33NO15	beta-D-Galactopyranosyl-(1->4)-2-amino-2-deoxy-beta-D-glucopyranosyl-(1->6)-D-mannose	7	Carbohydrate Metabolism	Undefined	-0.770588	-1.85185	-2.73059	0.032432
663.109	13.8212	C21H27N7O14P2	NAD+	10	Energy Metabolism	Oxidative phosphorylation; Glutamate metabolism; Nicotinate and nicotinamide metabolism	-0.815601	0.0328512	-0.571962	0.0070585
515.68	5.19533	C39H68N7O17P3S	Oleoyl-CoA	5	Lipid Metabolism	Biosynthesis of unsaturated fatty acids	-1.37155	-0.451077	-0.78739	0.042924
145.11	28.4505	C7H15NO2	Acetylcholine	7	Lipid Metabolism	Glycerophospholipid metabolism	0.136817	0.0608197	0.119071	0.01691
334.067	15.6498	C9H19O11P	sn-glycero-3-Phospho-1-inositol	5	Lipid Metabolism	Undefined	0.227832	-0.612709	-0.048164	0.011727
118.063	7.47844	C5H10O3	Hydroxypentanoate	7	Lipids: Fatty Acyls	Fatty Acids and Conjugates	-0.323288	-0.643586	-1.45745	0.012751
548.48	3.76362	C35H64O4	Cohibin A	5	Lipids: Fatty Acyls	Undefined	0.856858	-0.346859	-0.319244	0.0009453
602.527	3.7255	C39H70O4	1-(14-methyl-pentadecanoyl)-2-(8-[3]-ladderane-octanyl)-sn-glycerol	5	Lipids: Glycerolipids	Diradylglycerols	-0.664339	-0.0383589	-0.152084	0.032627
410.243	7.50496	C19H39O7P	PA(16:0)	7	Lipids: Glycerophospholipids	Glycerophosphates	0.953546	0.177542	0.850044	0.011727
495.332	5.02784	C24H50NO7P	PC(16:0)	7	Lipids: Glycerophospholipids	Glycerophosphocholines	0.570571	0.22033	0.0257087	0.04398
689.5	4.24175	C37H72NO8P	PE(32:1)	5	Lipids: Glycerophospholipids	Glycerophosphoethanolamines	1.17965	-0.340173	0.113594	0.00029157
687.484	4.22743	C37H70NO8P	PE(32:2)	5	Lipids: Glycerophospholipids	Glycerophosphoethanolamines	0.668804	-0.424519	-0.0716302	0.0022807
715.515	4.17776	C39H74NO8P	PE(34:2)	5	Lipids: Glycerophospholipids	Glycerophosphoethanolamines	-0.828826	-0.135352	-0.263666	0.02388
743.547	4.11789	C41H78NO8P	PE(36:2)	5	Lipids: Glycerophospholipids	Glycerophosphoethanolamines	-1.1185	-0.113043	-0.159994	0.0028818
720.494	3.75618	C38H73O10P	PG(32:1)	5	Lipids: Glycerophospholipids	Glycerophosphoglycerols	0.814396	-0.433357	-0.546043	0.00034753
760.526	3.74842	C41H77O10P	PG(35:2)	5	Lipids: Glycerophospholipids	Glycerophosphoglycerols	-0.658454	-0.178262	-0.109759	0.0064133
572.296	4.49624	C25H49O12P	PI(16:0)	5	Lipids: Glycerophospholipids	Glycerophosphoinositols	0.498104	0.279208	0.269269	0.038541
735.505	3.76173	C38H74NO10P	PS(32:0)	5	Lipids: Glycerophospholipids	Glycerophosphoserines	0.595005	-0.409375	-0.122809	0.0031357
733.525	4.27948	C39H76NO9P	PS(O-33:1)	5	Lipids: Glycerophospholipids	Glycerophosphoserines	1.1714	-0.257965	0.464551	0.00034753
546.464	3.76645	C35H62O4	[PR] bacteriohopane-32,33,34,35-tetrol	5	Lipids: Prenols	Hopanoids	0.506886	-0.394535	-0.0876635	0.0031357
155.991	8.58561	C3H8O3S2	2-(Methylthio)ethanesulfonate	5	Metabolism of Cofactors and Vitamins	Folate biosynthesis	0.0665972	-0.630794	-0.300992	0.025493
267.097	9.01023	C10H13N5O4	Adenosine	8	Nucleotide Metabolism	Purine metabolism	-0.0929501	0.252469	0.321947	0.01691
112.027	9.75331	C4H4N2O2	Orotate(Fragment)	8	Nucleotide Metabolism	Pyrimidine metabolism	-0.161101	-0.462875	-0.360702	0.01691
244.07	13.7138	C9H12N2O6	Pseudouridine	6	Nucleotide Metabolism	Pyrimidine metabolism	-0.824168	-0.243286	-0.6403	0.012751
244.069	9.76647	C9H12N2O6	Uridine	8	Nucleotide Metabolism	Pyrimidine metabolism	-0.072974	-0.495806	-0.390458	0.038541
310.514	16.3113	C15H22N5O16P3	ADP ribose 1'',2''-phosphate	5	Nucleotide Metabolism	Undefined	-0.68645	0.118654	-0.63279	0.020232
541.06	13.8261	C15H21N5O13P2	Cyclic ADP-ribose	5	Nucleotide Metabolism	Undefined	-0.768925	0.058511	-0.655499	0.01689
212.009	13.1061	C5H9O7P	P-DPD	6	Nucleotide Metabolism	Undefined	0.150375	-0.35316	0.153646	0.039278
156.017	10.1983	C5H4N2O4	Uracil 5-carboxylate	5	Nucleotide Metabolism	Undefined	-1.30656	0.0439442	0.0822164	0.0028818
400.232	10.6444	C18H32N4O6	Ala-Leu-Thr-Pro	5	Peptide(tetra-)	Hydrophobic peptide	-0.147992	-0.45883	-0.204245	0.038541
361.148	15.5348	C14H23N3O8	Glu-Asp-Val	5	Peptide(tri-)	Hydrophobic peptide	-1.35465	-1.08316	-2.23455	0.0061204
193.11	11.0787	C11H15NO2	Salsoline	7	Undefined	Undefined	0.0163388	0.142333	0.0246211	0.044338
230.09	9.53388	C9H14N2O5	(1R,2S,3R)-2-Acetyl-4(5)-(1,2,3,4-tetrahydroxybutyl)imidazole	7	Undefined	Undefined	-0.579612	-0.247015	-0.352728	0.02388
359.186	5.25347	C21H27O5	19-oic-deoxycorticosterone	5	Undefined	Undefined	0.113082	-0.455651	0.0675962	0.040741
326.191	3.78153	C18H30O3S	2-Dodecylbenzenesulfonic acid	5	Undefined	Undefined	0.253839	0.0471203	0.368276	0.0096719
165.079	13.6336	C9H11NO2	3-Pyridinebutanoicacid	7	Undefined	Undefined	-0.920363	-0.907353	-1.72765	0.039278
266.102	11.0845	C11H14N4O4	8-Oxodeoxycoformycin	5	Undefined	Undefined	-0.449752	0.193287	-0.0657204	0.038781
254.058	7.51137	C15H10O4	Apigeninidin	5	Undefined	Undefined	0.935319	-0.157983	0.66753	0.020232
232.035	11.5798	C5H13O8P	D-arabitol 5-phosphate	5	Undefined	Undefined	0.367997	0.139497	0.472356	0.0053086
101.12	10.0516	C6H15N	Hexylamine	5	Undefined	Undefined	-0.0913805	-0.0628839	0.15793	0.028664
320.051	15.8581	C8H17O11P	octulose 8-phosphate	5	Undefined	Undefined	-1.01742	0.102778	-0.259621	0.033035
324.106	15.3787	C10H28Cl2N2OP2	Polixetonium chloride	5	Undefined	Undefined	-1.38178	-1.05255	-2.06013	0.02201
