# Supplementary material for: Synergistic Killing of Polymyxin B in Combination With the Antineoplastic Drug Mitotane Against Polymyxin-Susceptible and -Resistant Acinetobacter baumannii: A Metabolomic Study
Source: Front Pharmacol. 2018 Apr 16;9:359. doi: 10.3389/fphar.2018.00359 (PMC5911485; doi:10.3389/fphar.2018.00359)
Supplement: Supplementary file 4 [file Table_4.XLSX]

## Sheet: Sheet1
Supplementary Table 4. Significant metabolites identified following exposure to polymyxin B and mitotane alone and in combination in A. baumannii FADDI-AB065. Significant fold-changes are highlighted in bold and italic. One-way ANOVA for multiple comparison, FDR ≤ 0.05; Fisher's LSD, p ≤ 0.05.
MASS	RT	FORMULA	METABOLITE	CONFIDENCE	MAP	PATHWAY	Log2-fold change			FDR
							Polmyxin B	Mitotane	Combination
117.079	11.1786	C5H11NO2	Betaine	10	Amino Acid Metabolism	Glycine, serine and threonine metabolism	-0.448011	-4.56187	-2.20391	3.15e-06
102.032	7.47431	C4H6O3	Succinate semialdehyde	6	Amino Acid Metabolism	Glutamate metabolism; Tyrosine metabolism; Butanoate metabolism; Vitamin B6 metabolism	-0.0613184	0.416287	-0.261008	8.42e-05
132.09	15.5306	C5H12N2O2	D-Ornithine	7	Amino Acid Metabolism	D-Arginine and D-ornithine metabolism	0.299535	0.851089	2.29445	0.00025444
679.103	15.2714	C20H31N3O19P2	UDP-N-acetylmuramate	8	Amino Acid Metabolism	D-Glutamine and D-glutamate metabolism; Aminosugars metabolism; Peptidoglycan biosynthesis	0.183424	-0.619771	1.75401	0.00048603
160.085	11.133	C6H12N2O3	D-Alanyl-D-alanine	6	Amino Acid Metabolism	D-Alanine metabolism; Peptidoglycan biosynthesis	0.0139602	-1.73312	0.13125	0.00048603
161.069	14.3633	C6H11NO4	L-2-Aminoadipate	9	Amino Acid Metabolism	Lysine biosynthesis; Lysine degradation; Penicillin and cephalosporin biosynthesis	0.972224	0.212606	2.13499	0.00082727
174.064	14.2137	C6H10N2O4	N-Formimino-L-glutamate	7	Amino Acid Metabolism	Histidine metabolism	-0.114469	-1.75238	-0.288418	0.00082727
232.106	13.1753	C9H16N2O5	gamma-Glutamyl-gamma-aminobutyrate	6	Amino Acid Metabolism	Arginine and proline metabolism	0.0643762	-1.34826	-0.668382	0.0016252
139.987	16.0165	C2H5O5P	Acetyl phosphate	8	Amino Acid Metabolism	Taurine and hypotaurine metabolism; Pyruvate metabolism	0.287672	-2.79419	0.270681	0.0027527
188.116	8.30498	C8H16N2O3	N6-Acetyl-L-lysine	5	Amino Acid Metabolism	Lysine degradation	0.0511545	-0.480995	-0.49931	0.0028841
230.106	9.33038	C13H14N2O2	(1xi,3xi)-1,2,3,4-Tetrahydro-1-methyl-beta-carboline-3-carboxylic acid	7	Amino Acid Metabolism	Undefined	0.0916871	-0.265727	0.696549	0.0029795
301.056	14.3121	C8H16NO9P	N-Acetyl-D-glucosamine 6-phosphate	8	Amino Acid Metabolism	Glutamate metabolism; Aminosugars metabolism	-0.18559	1.34405	1.17684	0.0029795
190.095	23.1181	C7H14N2O4	LL-2,6-Diaminoheptanedioate	6	Amino Acid Metabolism	Lysine biosynthesis	0.0872524	-1.04834	-0.189452	0.0051407
165.046	13.4131	C5H11NO3S	L-Methionine S-oxide	6	Amino Acid Metabolism	Methionine metabolism	-0.0194779	-0.866445	-0.230595	0.0053173
175.096	15.8753	C6H13N3O3	L-Citrulline	8	Amino Acid Metabolism	Arginine and proline metabolism	-0.103191	-0.602824	1.13699	0.005362
103.063	13.7154	C4H9NO2	N,N-Dimethylglycine	7	Amino Acid Metabolism	Glycine, serine and threonine metabolism	0.113627	0.0355828	0.132893	0.0059997
138.043	10.3693	C6H6N2O2	Urocanate	7	Amino Acid Metabolism	Histidine metabolism	0.0998349	-1.12645	0.2847	0.0078512
226.107	15.5131	C9H14N4O3	Carnosine	5	Amino Acid Metabolism	Alanine and aspartate metabolism; Histidine metabolism; beta-Alanine metabolism	0.141957	-0.981798	0.0625829	0.0082275
104.011	15.1585	C3H4O4	Hydroxypyruvate	6	Amino Acid Metabolism	Glycine, serine and threonine metabolism; Glyoxylate and dicarboxylate metabolism	-0.564015	-1.44526	-1.069	0.0090007
129.043	14.6091	C5H7NO3	5-Oxoproline	7	Amino Acid Metabolism	Glutathione metabolism	0.500619	-1.08446	-0.704606	0.012276
130.063	4.93365	C6H10O3	4-Methyl-2-oxopentanoate	10	Amino Acid Metabolism	Valine, leucine and isoleucine degradation; Valine, leucine and isoleucine biosynthesis	0.0385462	-0.701953	-0.310542	0.015857
129.079	7.5538	C6H11NO2	L-Pipecolate	5	Amino Acid Metabolism	Lysine degradation; Alkaloid biosynthesis II	-0.15943	-0.0989864	-0.123532	0.028559
137.084	28.4555	C8H11NO	Tyramine	7	Amino Acid Metabolism	Tyrosine metabolism; Alkaloid biosynthesis I	0.01951	-0.0791299	-0.128571	0.030193
116.047	7.45333	C5H8O3	5-Oxopentanoate	5	Amino Acid Metabolism	Lysine degradation	-0.0991819	-0.183722	-0.0081502	0.031614
102.032	7.10737	C4H6O3	2-Methyl-3-oxopropanoate	7	Amino Acid Metabolism	Valine-LeucineandIsoleucineDegradation	0.0283956	-0.0639472	0.063283	0.044137
188.116	14.8602	C8H16N2O3	N2-Acetyl-L-lysine	7	Amino Acid Metabolism	Lysine biosynthesis	-0.0241457	-0.488228	1.32011	0.0466
103.063	11.3023	C4H9NO2	(R)-3-Amino-2-methylpropanoate	5	Amino Acid Metabolism	Undefined	0.0196998	-0.0387759	0.0388539	0.0032621
188.08	10.2844	C7H12N2O4	N-Acetylglutamine	9	Amino Acid Metabolism	Undefined	0.198697	-2.63884	-0.256485	0.0075879
416.111	7.52097	C21H20O9	Daidzin	5	Biosynthesis of Secondary Metabolites	Isoflavonoid biosynthesis	0.222356	0.767221	1.23324	0.00025444
270.053	7.49864	C15H10O5	Apigenin	7	Biosynthesis of Secondary Metabolites	Flavonoid biosynthesis; Isoflavonoid biosynthesis	0.244061	1.04568	1.29739	0.00032833
290.04	15.7701	C7H15O10P	D-Sedoheptulose 7-phosphate	6	Carbohydrate Metabolism	Pentose phosphate pathway; Carbon fixation	-0.0560678	-3.44768	0.55763	0.00045529
185.993	16.4507	C3H7O7P	3-Phospho-D-glycerate	10	Carbohydrate Metabolism	Glycolysis / Gluconeogenesis; Glycine, serine and threonine metabolism; Glycerolipid metabolism; Glyoxylate and dicarboxylate metabolism; Carbon fixation	0.171962	-1.9288	0.0950253	0.00045529
200.008	15.7668	C4H9O7P	D-Erythrose 4-phosphate	8	Carbohydrate Metabolism	Pentose phosphate pathway; Phenylalanine, tyrosine and tryptophan biosynthesis; Carbon fixation; Vitamin B6 metabolism	0.222189	-2.741	0.584535	0.00048756
230.019	15.2853	C5H11O8P	D-Ribose 5-phosphate	8	Carbohydrate Metabolism	Pentose phosphate pathway; Purine metabolism; Carbon fixation	0.136756	-0.944211	0.500418	0.00082612
134.022	15.4646	C4H6O5	(S)-Malate	10	Carbohydrate Metabolism	Citrate cycle (TCA cycle); Glutamate metabolism; Alanine and aspartate metabolism; Pyruvate metabolism; Glyoxylate and dicarboxylate metabolism; Carbon fixation; Reductive carboxylate cycle (CO2 fixation)	0.822972	-0.849659	-0.823962	0.00096872
130.027	14.0871	C5H6O4	2,5-Dioxopentanoate	7	Carbohydrate Metabolism	Ascorbate and aldarate metabolism; Arginine and proline metabolism	-0.410537	-0.371012	-0.351636	0.0013139
179.079	13.2782	C6H13NO5	D-Galactosamine	7	Carbohydrate Metabolism	Galactose metabolism	0.220838	-0.613549	0.799409	0.0015731
196.058	13.4833	C6H12O7	D-Gluconic acid	10	Carbohydrate Metabolism	Pentose phosphate pathway	-0.31968	-0.360861	-0.642236	0.0032657
607.082	14.6521	C17H27N3O17P2	UDP-N-acetyl-D-glucosamine	10	Carbohydrate Metabolism	Aminosugars metabolism; Lipopolysaccharide biosynthesis; Peptidoglycan biosynthesis	-0.0147062	-1.08656	0.760409	0.0041889
342.116	15.7721	C12H22O11	Lactose	10	Carbohydrate Metabolism	Galactose metabolism	0.19838	-0.173395	1.52422	0.0066378
566.055	15.8493	C15H24N2O17P2	UDP-glucose	10	Carbohydrate Metabolism	Pentose and glucuronate interconversions; Galactose metabolism; Ascorbate and aldarate metabolism; Pyrimidine metabolism; Starch and sucrose metabolism; Nucleotide sugars metabolism; Glycerolipid metabolism; Zeatin biosynthesis; Biosynthesis of ansamycins	0.0589453	-0.748364	1.57085	0.0071474
259.046	15.9533	C6H14NO8P	alpha-D-Glucosamine 1-phosphate	8	Carbohydrate Metabolism	Aminosugars metabolism	0.119881	-1.42596	0.521539	0.0078512
106.027	16.3666	C3H6O4	D-Glycerate	6	Carbohydrate Metabolism	Glycine, serine and threonine metabolism; Glycerolipid metabolism; Glyoxylate and dicarboxylate metabolism	0.19208	-1.21903	-0.0836421	0.0086919
422.083	17.1899	C12H23O14P	alpha,alpha'-Trehalose 6-phosphate	8	Carbohydrate Metabolism	Starch and sucrose metabolism	-0.0561022	-0.494963	1.52407	0.0095443
621.061	17.1952	C17H25N3O18P2	UDP-N-acetyl-D-mannosaminouronate	8	Carbohydrate Metabolism	Aminosugars metabolism	0.00234992	-2.50615	0.679668	0.019609
84.0211	13.2809	C4H4O2	3-Butynoate	5	Carbohydrate Metabolism	Butanoate metabolism	0.113702	-0.607042	0.720819	0.020462
260.03	15.6375	C6H13O9P	D-Glucose 6-phosphate	10	Carbohydrate Metabolism	Starch and sucrose metabolism; Streptomycin biosynthesis; Inositol phosphate metabolism	-0.332608	-1.55273	0.0205554	0.021841
255.705	11.8334	C21H36N7O16P3S	CoA	8	Carbohydrate Metabolism	Citrate cycle (TCA cycle); Fatty acid metabolism; Pantothenate and CoA biosynthesis	0.619497	-1.26793	1.90897	0.025699
166.048	12.4282	C5H10O6	D-Xylonate	5	Carbohydrate Metabolism	Pentose and glucuronate interconversions	0.0246586	-0.101608	0.125801	0.048452
130.027	11.31	C5H6O4	Mesaconate	7	Carbohydrate Metabolism	C5-Branched dibasic acid metabolism	0.182079	-0.816515	-0.418634	0.049789
662.087	15.8445	C19H28N4O18P2	UDP-2,3-diacetamido-2,3-dideoxy-alpha-D-glucuronate	5	Carbohydrate Metabolism	Undefined	-0.735149	-0.868205	1.34052	0.0093304
189.1	12.2627	C8H15NO4	Castanospermine	5	Carbohydrate Metabolism	Undefined	-0.0691608	-0.108566	0.164262	0.043168
663.109	13.8212	C21H27N7O14P2	NAD+	10	Energy Metabolism	Oxidative phosphorylation; Glutamate metabolism; Nicotinate and nicotinamide metabolism	0.339288	-0.697951	1.15402	0.00045529
97.977	12.444	H3O4P	Orthophosphate	9	Energy Metabolism	Oxidative phosphorylation; Photosynthesis; Peptidoglycan biosynthesis	-0.0542546	-0.279644	-0.358608	0.00045529
210.074	13.7197	C7H14O7	Sedoheptulose	7	Energy Metabolism	Carbon fixation	0.43369	-1.82198	1.2148	0.0019803
743.075	16.3095	C21H28N7O17P3	NADP+	10	Energy Metabolism	Photosynthesis; Glutathione metabolism; Nicotinate and nicotinamide metabolism	0.223501	-0.5864	1.32347	0.0035322
238.069	13.2271	C8H14O8	3-Deoxy-D-manno-octulosonate	8	Glycan Biosynthesis and Metabolism	Lipopolysaccharide biosynthesis	0.287593	0.727335	2.65232	8.42e-05
172.014	14.4521	C3H9O6P	sn-Glycerol 3-phosphate	10	Lipid Metabolism	Glycerolipid metabolism; Glycerophospholipid metabolism	-0.0510027	-0.209453	1.54743	0.0030638
215.056	15.432	C5H14NO6P	sn-glycero-3-Phosphoethanolamine	7	Lipid Metabolism	Glycerophospholipid metabolism; Ether lipid metabolism	-0.694481	-1.70637	-1.62426	0.0044114
145.11	28.4505	C7H15NO2	Acetylcholine	7	Lipid Metabolism	Glycerophospholipid metabolism	0.133228	-0.0376674	-0.0322947	0.022951
102.032	13.328	C4H6O3	Acetoacetate	8	Lipid Metabolism	Synthesis and degradation of ketone bodies; Valine, leucine and isoleucine degradation; Tyrosine metabolism; Propanoate metabolism; Styrene degradation; Butanoate metabolism	-0.0706377	-0.163582	0.152455	0.025978
257.103	14.3619	C8H20NO6P	sn-glycero-3-Phosphocholine	10	Lipid Metabolism	Glycerophospholipid metabolism; Ether lipid metabolism	-0.0915381	-0.761936	-0.251205	0.032797
334.067	15.6498	C9H19O11P	sn-glycero-3-Phospho-1-inositol	5	Lipid metabolism	Undefined	-0.183669	-1.49749	-0.387084	0.005693
300.266	3.97727	C18H36O3	FA hydroxy(18:0)	5	Lipids: Fatty Acyls	Fatty Acids and Conjugates	-0.116617	-1.1421	-1.93549	6.05e-05
312.266	7.50644	C19H36O3	FA oxo(19:0)	5	Lipids: Fatty Acyls	Fatty Acids and Conjugates	0.0485499	1.41369	1.45046	0.00025444
576.511	3.73487	C37H68O4	Cohibin C	5	Lipids: Fatty Acyls	Undefined	0.0548617	0.04363	0.184446	0.0029795
548.48	3.76362	C35H64O4	Cohibin A	5	Lipids: Fatty Acyls	Undefined	-0.128064	-0.205325	-0.0645745	0.005693
268.24	3.92101	C17H32O2	FA methyl(16:1)	5	Lipids: Fatty Acyls	Fatty Acids and Conjugates	-0.361687	-0.444452	-0.983552	0.02404
103.063	11.7862	C4H9NO2	FA amino(4:0)	5	Lipids: Fatty Acyls	Amino Fatty Acids	0.0727499	-0.00682656	0.0446951	0.0323
574.495	3.74286	C37H66O4	Montecristin	5	Lipids: Fatty Acyls	Undefined	-0.0200505	-0.532797	0.0366998	0.03807
242.225	3.98115	C15H30O2	FA methyl(14:0)	5	Lipids: Fatty Acyls	Fatty Acids and Conjugates	0.0781656	-0.227973	-0.317644	0.046194
467.301	4.91799	C22H46NO7P	PC(14:0)	5	Lipids: Glycerophospholipids	Glycerophosphocholines	0	5.578	4.7475	8.69e-11
733.525	4.27948	C39H76NO9P	PS(O-33:1)	5	Lipids: Glycerophospholipids	Glycerophosphoserines	-0.180062	0.673662	0.389089	3.41e-05
743.547	4.11789	C41H78NO8P	PE(36:2)	5	Lipids: Glycerophospholipids	Glycerophosphoethanolamines	0.161462	0.615767	0.695741	9.46e-05
479.301	7.50705	C23H46NO7P	PE(18:1)	7	Lipids: Glycerophospholipids	Glycerophosphoethanolamines	-0.15212	-0.74559	-0.751309	0.0012727
715.515	4.17776	C39H74NO8P	PE(34:2)	5	Lipids: Glycerophospholipids	Glycerophosphoethanolamines	0.118787	-0.649613	-0.330899	0.0016103
495.332	5.02784	C24H50NO7P	PC(16:0)	7	Lipids: Glycerophospholipids	Glycerophosphocholines	-0.0756017	-1.51698	-0.260971	0.0017466
572.296	4.49624	C25H49O12P	PI(16:0)	5	Lipids: Glycerophospholipids	Glycerophosphoinositols	-0.221953	-1.41905	-0.287979	0.0029795
410.243	7.50496	C19H39O7P	PA(16:0)	7	Lipids: Glycerophospholipids	Glycerophosphates	-0.119272	-0.223424	1.52352	0.0035322
689.5	4.24175	C37H72NO8P	PE(32:1)	5	Lipids: Glycerophospholipids	Glycerophosphoethanolamines	-0.187146	-0.129385	-0.0149559	0.0035322
521.349	4.91545	C26H52NO7P	PC(18:1)	7	Lipids: Glycerophospholipids	Glycerophosphocholines	-0.125072	-1.45644	-0.341386	0.0049981
687.484	4.22743	C37H70NO8P	PE(32:2)	5	Lipids: Glycerophospholipids	Glycerophosphoethanolamines	-0.158928	-0.902346	-0.422061	0.013264
735.505	3.76173	C38H74NO10P	PS(32:0)	5	Lipids: Glycerophospholipids	Glycerophosphoserines	-0.0784018	-0.700058	-0.0420648	0.031564
488.757	3.85061	C46H81N3O15P2	CDP-DG(16:0/18:2(9Z,12Z))	5	Lipids: Glycerophospholipids	Undefined	0.36444	0.275741	1.01186	0.048076
523.364	4.87953	C26H54NO7P	PC(18:0)	5	Lipids: Glycerophospholipids	Glycerophosphocholines	-0.257662	-0.85086	-0.432037	0.048452
246.051	12.2592	C6H15O8P	Glycerophosphoglycerol	7	Lipids: Glycerophospholipids	Undefined	-0.81214	-1.46674	-1.40216	0.0071474
546.464	3.76645	C35H62O4	[PR] bacteriohopane-32,33,34,35-tetrol	5	Lipids: Prenols	Hopanoids	-0.144104	-0.713809	-0.167755	0.019609
562.388	4.19768	C33H54O7	Cholesterolglucuronide	5	Lipids: Sterol lipids	Pentose and glucuronate interconversions; Starch and sucrose metabolism	-0.220105	-0.990067	-0.205911	0.016487
195.076	10.3892	C7H9N5O2	2-Amino-4-hydroxy-6-hydroxymethyl-7,8-dihydropteridine	6	Metabolism of Cofactors and Vitamins	Folate biosynthesis	0.247336	-2.92262	1.13963	0.0061735
155.991	8.58561	C3H8O3S2	2-(Methylthio)ethanesulfonate	5	Metabolism of Cofactors and Vitamins	Folate biosynthesis	-0.0889161	-0.692599	-0.569907	0.0065541
112.027	8.56621	C4H4N2O2	Uracil	10	Nucleotide Metabolism	Pyrimidine metabolism; beta-Alanine metabolism; Pantothenate and CoA biosynthesis	-0.169089	-0.725301	-0.734249	0.00045529
322.056	12.3409	C10H15N2O8P	dTMP	10	Nucleotide Metabolism	Pyrimidine metabolism	-0.111011	1.03654	3.0124	0.00047681
111.043	10.5713	C4H5N3O	Cytosine	10	Nucleotide Metabolism	Pyrimidine metabolism	-0.278764	-0.725006	1.06106	0.00048603
331.068	12.2644	C10H14N5O6P	dAMP	8	Nucleotide Metabolism	Purine metabolism	-0.44383	-0.3147	1.76929	0.00048603
347.063	13.213	C10H14N5O7P	AMP	10	Nucleotide Metabolism	Purine metabolism; Zeatin biosynthesis	0.0945593	0.335686	1.10562	0.00048603
243.085	11.7299	C9H13N3O5	Cytidine	8	Nucleotide Metabolism	Pyrimidine metabolism	-0.331363	-0.742824	1.13308	0.00075431
323.052	15.0774	C9H14N3O8P	CMP	10	Nucleotide Metabolism	Pyrimidine metabolism	-0.275678	-0.401502	1.69764	0.00092296
324.036	14.1283	C9H13N2O9P	UMP	10	Nucleotide Metabolism	Pyrimidine metabolism; Peptidoglycan biosynthesis	-0.140662	-0.321009	1.74366	0.0013139
364.042	17.4147	C10H13N4O9P	Xanthosine 5'-phosphate	8	Nucleotide Metabolism	Purine metabolism	0.0523382	-2.69814	1.10238	0.0014007
308.041	13.2614	C9H13N2O8P	dUMP	8	Nucleotide Metabolism	Pyrimidine metabolism	-0.555061	-3.08243	-0.083477	0.0026287
152.033	10.9243	C5H4N4O2	Xanthine	10	Nucleotide Metabolism	Purine metabolism; Caffeine metabolism	0.181132	-0.647546	0.997236	0.0029795
404.002	16.056	C9H14N2O12P2	UDP	10	Nucleotide Metabolism	Pyrimidine metabolism; Peptidoglycan biosynthesis; Zeatin biosynthesis	-0.0434227	-0.763344	0.873046	0.0050173
227.091	10.3433	C9H13N3O4	Deoxycytidine	10	Nucleotide Metabolism	Pyrimidine metabolism	-0.190122	-1.66083	3.15931	0.0079624
403.018	16.6742	C9H15N3O11P2	CDP	6	Nucleotide Metabolism	Pyrimidine metabolism	-0.120372	-0.311542	1.32902	0.0094977
411.034	14.0338	C10H15N5O9P2	dADP	5	Nucleotide Metabolism	Purine metabolism	-0.285338	0.0889127	1.20696	0.013264
402.023	14.3142	C10H16N2O11P2	dTDP	8	Nucleotide Metabolism	Pyrimidine metabolism	0.0288347	-0.490466	1.35071	0.020462
251.102	11.3093	C10H13N5O3	5'-Deoxyadenosine	6	Nucleotide Metabolism	Undefined	0.0810656	-0.824344	0.016268	0.033228
267.097	9.01023	C10H13N5O4	Adenosine	8	Nucleotide Metabolism	Purine metabolism	-0.774223	-0.120775	-1.05553	0.034107
347.063	12.4968	C10H14N5O7P	3'-AMP	7	Nucleotide Metabolism	Purine metabolism	-0.0780591	-0.218993	0.724242	0.036588
383.108	13.967	C14H17N5O8	Succinyladenosine	7	Nucleotide Metabolism	Undefined	0.942389	1.91032	2.71202	0.00087206
541.06	13.8261	C15H21N5O13P2	Cyclic ADP-ribose	5	Nucleotide Metabolism	Undefined	0.31445	-0.661096	1.18899	0.0020307
310.514	16.3113	C15H22N5O16P3	ADP ribose 1,2-phosphate	5	Nucleotide Metabolism	Undefined	0.357799	-0.191603	1.56881	0.0038832
122.048	13.8993	C6H6N2O	Isonicotineamide	5	Nucleotide Metabolism	Undefined	0.306193	-0.242139	0.857678	0.034371
348.047	14.9447	C10H13N4O8P	Inosine 2'-phosphate	7	Nucleotide Metabolism	Undefined	-0.53403	-1.37311	0.227143	0.045356
258.085	16.23	C10H14N2O6	Ribothymidine	7	Nucleotide Metabolism	Undefined	-1.03871	0.026812	1.24769	0.0466
216.147	7.47802	C10H20N2O3	Val-Val	5	Peptide(di-)	Hydrophobic peptide	-0.194073	-0.299641	-0.474775	0.0032388
186.1	11.156	C8H14N2O3	Ala-Pro	5	Peptide(di-)	Nonpolar peptide	0.0156961	-0.794144	-0.612467	0.0035322
291.122	9.22464	C14H17N3O4	Trp-Ser	5	Peptide(di-)	Hydrophobic peptide	-0.347251	-3.48668	0.985604	0.005693
248.119	7.47321	C10H20N2O3S	Met-Val	5	Peptide(di-)	Hydrophobic peptide	-0.207023	-0.94527	-0.866767	0.016075
172.085	12.1334	C7H12N2O3	Glycylproline	5	Peptide(di-)	Polar peptide	-0.0930971	-0.688934	-0.432168	0.02404
174.1	9.56487	C7H14N2O3	Val-Gly	5	Peptide(di-)	Hydrophobic peptide	0.0741884	-0.843544	-0.700882	0.031016
340.175	12.4258	C15H24N4O5	Ala-Gly-Pro-Pro	5	Peptide(tetra-)	Polar peptide	0.362382	-0.738529	0.643373	0.0032657
313.164	11.7052	C14H23N3O5	Thr-Pro-Pro	7	Peptide(tri-)	Polar peptide	0.101757	-3.30716	0.143101	0.0026636
361.148	15.5348	C14H23N3O8	Glu-Asp-Val	5	Peptide(tri-)	Hydrophobic peptide	-0.0221759	-1.58846	1.02462	0.013913
343.174	11.7342	C15H25N3O6	Ile-Asp-Pro	7	Peptide(tri-)	Hydrophobic peptide	0.28132	0.0634897	0.896798	0.044137
289.127	12.6775	C11H19N3O6	Ophthalmicacid	7	Peptide(tri-)	Undefined	0.695558	-1.99597	1.29058	0.017298
218.073	8.44701	C8H14N2O3S	Cysteinyl-Proline	5	Peptides	Undefined	-0.547813	-1.68845	-0.989057	0.00042816
244.178	5.02052	C12H24N2O3	Isoleucyl-Leucine	7	Peptides	Undefined	-0.0334541	-0.741789	-1.61219	0.0041889
202.132	6.30653	C9H18N2O3	Alanyl-Leucine	7	Peptides	Undefined	-0.0911655	-1.13084	-0.923817	0.0065541
232.142	6.06327	C10H20N2O4	Threoninyl-Leucine	7	Peptides	Undefined	-0.0394565	-0.672095	-0.408849	0.013423
260.137	11.2192	C11H20N2O5	L-gamma-glutamyl-L-isoleucine	5	Peptides	Undefined	-0.0872393	-0.535197	-0.525229	0.017298
921.382	13.8606	C37H59N7O20	GlcNAc-1,6-anhMurNAc-L-Ala-gamma-D-Glu-DAP-D-Ala	7	Undefined	Undefined	0.591469	-1.88425	-0.659993	0.00025444
254.058	7.51137	C15H10O4	Apigeninidin	5	Undefined	Undefined	0.233493	0.878671	1.18542	0.00045529
193.11	11.0787	C11H15NO2	Salsoline	7	Undefined	Undefined	-0.0528228	-0.111672	-0.00399506	0.00045529
112.016	12.7525	C5H4O3	2-Furoate	7	Undefined	Undefined	0.535209	0.0691595	2.79932	0.00045529
272.03	15.7637	C7H13O9P	alpha-(2,6-anhydro-3-deoxy-D-arabino-heptulopyranosid)onate 7-phosphate	5	Undefined	Undefined	-0.0748442	-1.70472	0.575571	0.00099603
193.11	12.8027	C11H15NO2	Heliamine	7	Undefined	Undefined	0.0091899	-0.0661973	0.00802166	0.0011185
237.085	12.5327	C8H15NO7	N-Acetyl-D-glucosaminate	5	Undefined	Undefined	0.235819	-0.276004	2.29429	0.0015731
490.267	3.8547	C51H80O18	Ziziphin	5	Undefined	Undefined	0.160519	0.825001	0.785144	0.0015731
129.152	8.16748	C8H19N	Octylamine	5	Undefined	Undefined	-0.0125513	-0.0446586	0.0149577	0.0016285
220.058	12.6322	C8H12O7	dihomocitrate	5	Undefined	Undefined	1.86508	1.27899	4.50407	0.0018852
128.059	7.49304	C5H8N2O2	L-Cyclo(alanylglycyl)	5	Undefined	Undefined	-0.012706	-0.0285935	0.137799	0.0029795
101.12	10.0516	C6H15N	Hexylamine	5	Undefined	Undefined	-0.00490553	-0.0332487	0.0173265	0.0030075
188.116	7.89937	C8H16N2O3	6-Acetamido-3-aminohexanoate	5	Undefined	Undefined	-0.212821	-0.91564	-0.839385	0.0030638
126.043	7.52387	C5H6N2O2	Imidazol-4-ylacetate	7	Undefined	Undefined	0.173406	-0.383799	1.59229	0.0034735
193.11	11.6237	C11H15NO2	3,4-Methylenedioxymethamphetamine	7	Undefined	Undefined	-0.0420063	-0.106021	0.00530625	0.0050173
320.051	15.8581	C8H17O11P	octulose 8-phosphate	5	Undefined	Undefined	0.606321	-0.564681	2.62504	0.0058012
103.1	14.3037	C5H13NO	Neurine	5	Undefined	Undefined	0.00983249	0.0333012	0.0441533	0.0078512
249.086	7.77543	C10H19NO2S2	S-Acetyldihydrolipoamide	8	Undefined	Alanineandaspartatemetabolism	0.125026	1.07499	-1.40314	0.013913
114.032	15.7641	C5H6O3	L-erythro-ascorbate	7	Undefined	Undefined	-0.0589133	-0.122062	-0.00502028	0.019589
278.191	7.30936	C20H24N	2-ethyl-1,5-dimethyl-3,3-diphenylpyrrolinium (EDDP)	7	Undefined	Undefined	-0.000568515	-0.111016	-0.0399273	0.020381
232.035	11.5798	C5H13O8P	D-arabitol 5-phosphate	5	Undefined	Undefined	0.0772496	0.0744257	0.171861	0.020381
312.176	7.27715	C17H28O3S	N-Undecylbenzenesulfonic acid	5	Undefined	Undefined	0.0986496	0.0489345	0.188152	0.023264
141.986	11.5759	C2H7O3PS	dimethylthiophosphate	5	Undefined	methyl parathion degradation	0.0372989	0.0244705	-0.00726265	0.028925
324.106	15.3787	C10H28Cl2N2OP2	Polixetonium chloride	5	Undefined	Undefined	-0.0831195	-0.358966	0.57992	0.0299
113.945	20.9544	H2O3S2	H2S2O3	8	Undefined	sulfur disproportionation II (aerobic) ; superpathway of sulfur oxidation (Acidianus ambivalens) ; superpathway of tetrathionate reduction (Salmonella typhimurium) ; tetrathionate reduction I (to thiosulfate) ; sulfate reduction IV (dissimilatory)	0.169954	-0.196068	-0.429513	0.043892
175.085	12.093	C7H13NO4	Calystegin B2	7	Undefined	Undefined	0.049449	0.0338126	0.126454	0.0466
